# Supplementary material
Source: HighWire-hosted journal article supplement (https://erj.ersjournals.com/content/56/3/2000404)
Supplement: inline-supplementary-material-2 [file inline-supplementary-material-2.pdf]

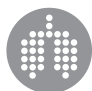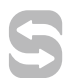

SHAREABLE PDF

# Cigarette smoke-initiated autoimmunity facilitates sensitisation to elastin-induced COPD-like pathologies in mice

Jie-Sen Zhou<sup>1,12</sup>, Zhou-Yang Li<sup>1,12</sup>, Xu-Chen Xu<sup>1</sup>, Yun Zhao<sup>1</sup>, Yong Wang<sup>1</sup>, Hai-Pin Chen<sup>1</sup>, Min Zhang<sup>1</sup>, Yin-Fang Wu<sup>1</sup>, Tian-Wen Lai<sup>1</sup>, Chun-Hong Di<sup>2</sup>, Ling-Ling Dong<sup>1</sup>, Juan Liu<sup>1</sup>, Nan-Xia Xuan<sup>1</sup>, Chen Zhu<sup>1</sup>, Yan-Ping Wu<sup>1</sup>, Hua-Qiong Huang<sup>1</sup>, Fu-Gui Yan<sup>1</sup>, Wen Hua<sup>1</sup>, Yi Wang<sup>3</sup>, Wei-Ning Xiong<sup>3</sup>, Hui Qiu<sup>4</sup>, Tao Chen<sup>4</sup>, Dong Weng<sup>4</sup>, Hui-Ping Li<sup>4</sup>, Xiaobo Zhou<sup>5</sup>, Lie Wang<sup>6</sup>, Fang Liu<sup>7</sup>, Xin Lin<sup>7</sup>, Song-Min Ying<sup>1</sup>, Wen Li<sup>1</sup>, Mitsuru Imamura<sup>8</sup>, Mary E. Choi<sup>9</sup>, Martin R. Stampfli<sup>10,11</sup>, Augustine M.K. Choi<sup>8,13</sup>, Zhi-Hua Chen<sup>1,13</sup> and Hua-Hao Shen<sup>1,11,13</sup>

**Affiliations:** <sup>1</sup>Key Lab of Respiratory Disease of Zhejiang Province, Dept of Respiratory and Critical Care Medicine, Second Affiliated Hospital, Zhejiang University School of Medicine, Hangzhou, China. <sup>2</sup>Dept of Clinical Laboratory, the Affiliated Hospital of Hangzhou Normal University, Hangzhou, China. <sup>3</sup>Dept of Respiratory and Critical Care Medicine, Key Laboratory of Pulmonary Diseases of Health Ministry, Tongji Hospital, Tongji Medical College, Huazhong University of Sciences and Technology, Wuhan, China. <sup>4</sup>Dept of Respiratory Medicine, Shanghai Pulmonary Hospital, Tongji University School of Medicine, Shanghai, China. <sup>5</sup>Channing Laboratory, Brigham and Women's Hospital, Harvard Medical School, Boston, MA, USA. <sup>6</sup>Institute of Immunology, Zhejiang University School of Medicine, Hangzhou, China. <sup>7</sup>Institute for Immunology, Tsinghua University School of Medicine, Tsinghua University-Peking University Jointed Center for Life Sciences, Beijing, China. <sup>8</sup>Division of Pulmonary and Critical Care Medicine, Weill Cornell Medical College, New York, NY, USA. <sup>9</sup>Division of Nephrology and Hypertension, Joan and Sanford I. Weill Dept of Medicine, New York-Presbyterian Hospital, Weill Cornell Medical College, New York, NY, USA. <sup>10</sup>Dept of Pathology and Molecular Medicine, McMaster Immunology Research Centre, and Dept of Medicine, Firestone Institute for Respiratory Health at St Joseph's Healthcare, McMaster University, Hamilton, ON, Canada. <sup>11</sup>State Key Lab of Respiratory Disease, National Clinical Research Center for Respiratory Disease, Guangzhou, China. <sup>12</sup>These authors contribute equally to this work. <sup>13</sup>These authors contribute equally to this work.

**Correspondence:** Hua-Hao Shen, Dept of Respiratory and Critical Care Medicine, Key Laboratory of Respiratory Disease of Zhejiang Province, Second Affiliated Hospital, Zhejiang University School of Medicine, 88 Jiefang Rd, Hangzhou 310009, China. E-mail: huahaoshen@zju.edu.cn

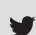

@ERSpublications

**MMP12-generated elastin fragments serve as a self-antigen and drive cigarette smoke-induced autoimmune processes in mice. These findings provide experimental evidence for cigarette smoke-induced autoimmunity and represent a novel mouse model of COPD.** <https://bit.ly/2XK9dC6>

**Cite this article as:** Zhou J-S, Li Z-Y, Xu X-C, *et al.* Cigarette smoke-initiated autoimmunity facilitates sensitisation to elastin-induced COPD-like pathologies in mice. *Eur Respir J* 2020; 56: 2000404 [<https://doi.org/10.1183/13993003.00404-2020>].

This single-page version can be shared freely online.

**ABSTRACT** It is currently not understood whether cigarette smoke exposure facilitates sensitisation to self-antigens and whether ensuing auto-reactive T cells drive chronic obstructive pulmonary disease (COPD)-associated pathologies.

To address this question, mice were exposed to cigarette smoke for 2 weeks. Following a 2-week period of rest, mice were challenged intratracheally with elastin for 3 days or 1 month. *Rag1*<sup>-/-</sup>, *Mmp12*<sup>-/-</sup>, and *Il17a*<sup>-/-</sup> mice and neutralising antibodies against active elastin fragments were used for mechanistic

investigations. Human GVAPGVGVAPGV/HLA-A\*02:01 tetramer was synthesised to assess the presence of elastin-specific T cells in patients with COPD.

We observed that 2 weeks of cigarette smoke exposure induced an elastin-specific T cell response that led to neutrophilic airway inflammation and mucus hyperproduction following elastin recall challenge. Repeated elastin challenge for 1 month resulted in airway remodelling, lung function decline and airspace enlargement. Elastin-specific T cell recall responses were dose dependent and memory lasted for over 6 months. Adoptive T cell transfer and studies in T cells deficient *Rag1*<sup>-/-</sup> mice conclusively implicated T cells in these processes. Mechanistically, cigarette smoke exposure-induced elastin-specific T cell responses were matrix metalloproteinase (MMP)12-dependent, while the ensuing immune inflammatory processes were interleukin 17A-driven. Anti-elastin antibodies and T cells specific for elastin peptides were increased in patients with COPD.

These data demonstrate that MMP12-generated elastin fragments serve as a self-antigen and drive the cigarette smoke-induced autoimmune processes in mice that result in a bronchitis-like phenotype and airspace enlargement. The study provides proof of concept of cigarette smoke-induced autoimmune processes and may serve as a novel mouse model of COPD.
